# Supplementary material
Source: PubMed Central journal article supplement (PMC9308756)
Supplement: NIHMS1820090-supplement-Supporting_Material.pdf [file NIHMS1820090-supplement-Supporting_Material.pdf]

## Supporting Information

### **Synthesis and Evaluation of Diaza-Crown Ether-Backboned Chelator Containing Hydroxamate Groups for Zr-89 Chelation Chemistry**

Shuyuan Zhang,<sup>a</sup> Haixing Wang,<sup>a</sup> Siyuan Ren,<sup>a</sup> Yanda Chen,<sup>a</sup> Dijie Liu,<sup>b,c</sup> Mengshi Li,<sup>b,c</sup>  
Edwin Sagastume,<sup>c</sup> Hyun-Soon Chong<sup>a,\*</sup>

<sup>a</sup>Department of Chemistry, Illinois Institute of Technology, Chicago, IL, USA.; <sup>b</sup>Department of Radiology, University of Iowa, Iowa City, IA, USA.; <sup>c</sup>Viewpoint Molecular Targeting Inc, Coralville, IA, USA.

#### Table of Contents

|                                                                                                     |            |
|-----------------------------------------------------------------------------------------------------|------------|
| I. Materials and Methods -----                                                                      | p. S2-S6   |
| II. NMR Spectra of compounds 2, 4, and 5 -----                                                      | p. S7-S9   |
| III. Evaluation of chelators for radiolabeling with <sup>89</sup> Zr -----                          | p. S10     |
| IV. Evaluation of <sup>89</sup> Zr-labeled complexes for stability in human serum -----             | p. S11-S13 |
| V. Evaluation of <sup>89</sup> Zr-labeled complexes for stability in EDTA solution -----            | p. S13-S15 |
| VI. Evaluation of <sup>89</sup> Zr-labeled complexes for stability in Apo-Transferrin solution ---- | p. S16-S17 |
| VII. <i>In vivo</i> biodistribution data of <sup>89</sup> Zr-labeled complexes -----                | p. S18     |

## I. Materials and Methods

$^1\text{H}$  and  $^{13}\text{C}$  NMR spectra were obtained using a Bruker 300 instrument, and chemical shifts are reported in ppm on the  $\delta$  scale relative to solvent. Electrospray ionization (ESI) high resolution mass spectra (HRMS) were obtained on JEOL double sector JMS-AX505HA mass spectrometer (University of Notre Dame, IN). All reagents were purchased from Sigma-Aldrich or Acros Organics and used as received unless otherwise noted.

**2-Bromo-N-((4-methoxybenzyl)oxy)-N-methylacetamide (2).**<sup>14</sup> To a solution of **1**<sup>15</sup> (400 mg, 2.39 mmol) in  $\text{CH}_2\text{Cl}_2$  (8 mL) was added  $\text{K}_2\text{CO}_3$  (363.5 mg, 2.63 mmol) and bromo acetyl bromide (531.1 mg, 2.63 mmol) at 0 °C. The resulting mixture was stirred for 1 h. The reaction mixture was filtered, concentrated to dryness, and purified via column chromatography on silica gel eluting with 15%-20% ethyl acetate in hexane to provide product **2** (530 mg, 77%).  $^1\text{H}$  NMR ( $\text{CDCl}_3$ , 300 MHz)  $\delta$  3.25 (s, 3H), 3.82 (s, 3H), 3.89 (s, 2H), 4.87 (s, 2H), 6.92 (d,  $J = 8.7$  Hz, 2H), 7.32 (d,  $J = 8.7$  Hz, 2H).  $^{13}\text{C}$  NMR ( $\text{CDCl}_3$ , 75 MHz)  $\delta$  25.8 (t), 33.9 (q), 55.3 (q), 76.1 (t), 114.3 (d), 126.0 (s), 131.2 (d), 160.4 (s), 168.2 (s).

**2,2'-(1,4,10,13-Tetraoxa-7,16-diazacyclooctadecane-7,16-diyl)bis(N-((4-methoxybenzyl)oxy)-N-methylacetamide) (4).** To a solution of **3** (100 mg, 0.38 mmol) in  $\text{CH}_3\text{CN}$  (5 mL) was added  $\text{K}_2\text{CO}_3$  (420.8 mg, 3.05 mmol) and **2** (241.6 mg, 0.83 mmol). The resulting mixture was stirred for 14 h at room temperature. The reaction mixture was filtered, concentrated to dryness, and purified via column chromatography on silica gel eluting with 3%  $\text{CH}_3\text{OH}$  in  $\text{CH}_2\text{Cl}_2$  to provide product **4** (107.6 mg, 41%).  $^1\text{H}$  NMR ( $\text{CDCl}_3$ , 300 MHz)  $\delta$  2.53 (s, 6H), 3.10-3.24 (m, 10H), 3.44-3.57 (m, 18H), 3.80 (s, 6H), 4.75 (s, 4H), 6.88 (d,  $J = 8.0$  Hz, 4H), 7.28 (d,  $J = 9.0$  Hz, 4H).  $^{13}\text{C}$  NMR ( $\text{CDCl}_3$ , 75 MHz)  $\delta$  33.3 (q), 54.9 (t), 55.4 (q), 57.9 (t), 67.1 (t), 68.8 (t), 75.6 (t), 114.1 (d), 126.1 (s), 131.5 (d), 160.4 (s), 173.5 (s). HRMS (positive ion ESI) Calcd for  $\text{C}_{34}\text{H}_{52}\text{N}_4\text{O}_{10}$   $[\text{M} + \text{H}]^+$   $m/z$  677.3756. Found:  $[\text{M} + \text{H}]^+$   $m/z$  677.3770.

**2,2'-(1,4,10,13-Tetraoxa-7,16-diazacyclooctadecane-7,16-diyl)bis(N-hydroxy-N-methylacetamide) (5).** To compound **4** (107 mg, 0.16 mmol) was sequentially added TFA (2 mL) and triethyl silane (36.8

mg, 0.32 mmol) at 0 °C. The resulting mixture was stirred for 14 h at room temperature. The reaction mixture was evaporated to dryness and washed with CH<sub>2</sub>Cl<sub>2</sub> to afford compound **5** (69 mg, 99%). <sup>1</sup>H NMR (D<sub>2</sub>O, 300 MHz) δ 3.15 (s, 6H), 3.48-3.78 (m, 24H), 4.33 (s, 4H). <sup>13</sup>C NMR (D<sub>2</sub>O, 75 MHz) δ 36.2 (q), 55.5 (2C, t), 64.2 (t), 69.8 (t), 164.9 (s). HRMS (positive ion ESI) Calcd for C<sub>18</sub>H<sub>36</sub>N<sub>4</sub>O<sub>8</sub> [M + H]<sup>+</sup> m/z 437.2619. Found: [M + H]<sup>+</sup> m/z 437.2606.

**Radiolabeling of chelators with <sup>89</sup>Zr.** All HCl solutions were prepared from the commercially available ultrapure HCl solution (JT baker, #6900-05). For metal-free radiolabeling, plasticware including pipette tips, tubes, and caps was soaked in 0.1 M HCl overnight and washed thoroughly with Milli-Q (18.2 MΩ) water and air-dried overnight. Ultrapure ammonium acetate (Sigma-Aldrich, #431311) was used to prepare 0.25 M NH<sub>4</sub>OAc buffer solution (0.25 M, pH 7.0). After adjusting pH using 0.1 M HCl or 1 M HCl or 1 M NaOH solution, 0.25 M NH<sub>4</sub>OAc buffer solution was treated with Chelex-100 resin (Biorad, #142-2842, 1 g/100 mL buffer solution), shaken overnight at RT, and filtered through a 0.22 μm filter (Corning, #430320) prior to use. Ethylenediaminetetraacetic Acid (EDTA, Sigma-Aldrich, #03609) was used to prepare 100 mM EDTA solution (pH 7.0 and pH 5.0). <sup>89</sup>Zr-Oxalate was purchased from Washington University (St. Louis, MO). Stock solution of <sup>89</sup>Zr-Oxalate was adjusted to pH 7.5~8.0 by adding 1 M Na<sub>2</sub>CO<sub>3</sub> solution that was treated with Chelex-100 resin. ITLC-SA plates (1 × 9 cm, ITLC-silica acid, Agilent Technologies, #A120B12) with the origin line drawn at 0.5 cm from the bottom were prepared.

To a buffer solution (0.25M NH<sub>4</sub>OAc, pH 7.0) in a capped microcentrifuge tube (1.5 mL) was sequentially added a solution of DA-18C6-BHA (0.25 mM, 2.2 μg, 0.5 μL/0.25 M NH<sub>4</sub>OAc, pH 7.0) or DFO (0.25 mM, 3.3 μg, 0.5 μL/ 0.25 M NH<sub>4</sub>OAc, pH 7.0) and a solution of <sup>89</sup>Zr (0.37 MBq, 10 μCi), and the total volume of the resulting solution was brought up to 20 μL by adding 0.25 M NH<sub>4</sub>OAc solution (pH 7.0). The reaction mixture was agitated on the thermomixer (Eppendorf, #022670549) set at 1000 rpm at room temperature for 1 h. Radiolabeling efficiency was determined by ITLC-SA (eluent: 100mM EDTA, pH 5.0). A solution of reaction mixture (2 μL) was withdrawn at the designated time

points, spotted on an ITLC plate and eluted with the mobile phase. After completion of elution, the ITLC plate was warmed and dried on the surface of a hotplate maintained at 35 °C and scanned using a TLC scanner (Bioscan, #FC-1000). The radiolabeled complex  $^{89}\text{Zr-DA-18C6-BHA}$  or  $^{89}\text{Zr-DFO}$  was detected at ~30 mm from the bottom of the ITLC plate, while the unbound  $^{89}\text{Zr}$  moved faster (~65 mm).

***In vitro* serum stability of  $^{89}\text{Zr}$ -radiolabeled complexes.** Human serum was purchased from Gemini Bio-products (#100110).  $^{89}\text{Zr-DA-18C6-BHA}$  and  $^{89}\text{Zr-DFO}$  were prepared by reaction of DA-18C6-BHA (1 mM, 8.7  $\mu\text{g}$ , 2  $\mu\text{L}$ / 0.25 M  $\text{NH}_4\text{OAc}$ , pH 7.0) or DFO (1 mM, 13  $\mu\text{g}$ , 2  $\mu\text{L}$ / 0.25 M  $\text{NH}_4\text{OAc}$ , pH 7.0) with  $^{89}\text{Zr}$  (1.05  $\mu\text{L}$ , 1.11 MBq, 30  $\mu\text{Ci}$ ) in 0.25 M  $\text{NH}_4\text{OAc}$  buffer (pH 7.0), respectively. The total volume of the resulting solution was brought up to 20  $\mu\text{L}$  by adding 0.25 M  $\text{NH}_4\text{OAc}$  solution (pH 7.0). Completion of radiolabeling was determined by ITLC-SA (eluent: 100mM EDTA, pH 5.0), and the resulting complexes  $^{89}\text{Zr-DA-18C6-BHA}$  and  $^{89}\text{Zr-DFO}$  were directly used for serum stability studies without further purification.  $^{89}\text{Zr-DA-18C6-BHA}$  (1.11 MBq, 30  $\mu\text{Ci}$ , 20  $\mu\text{L}$ ) or  $^{89}\text{Zr-DFO}$  (1.11 MBq, 30  $\mu\text{Ci}$ , 20  $\mu\text{L}$ ) was added to human serum (200  $\mu\text{L}$ ) in a microcentrifuge tube. The stability of the radiolabeled complexes in human serum was evaluated at 37 °C for 7 days. The serum stability of the radiolabeled complexes was assessed by measuring the transfer of the radionuclide from each complex to serum proteins using ITLC-SA (eluent: 100 mM EDTA, pH 5.0). A portion of the radiolabeled complex in serum was withdrawn at the designated time point and evaluated by ITLC-SA. The radiolabeled complex  $^{89}\text{Zr-DA-18C6-BHA}$  or  $^{89}\text{Zr-DFO}$  was detected at ~30 mm from the bottom of the TLC plate, while the unbound  $^{89}\text{Zr}$  moved faster (~65 mm).

**EDTA challenge of  $^{89}\text{Zr}$ -radiolabeled complexes.**  $^{89}\text{Zr-DA-18C6-BHA}$  and  $^{89}\text{Zr-DFO}$  were prepared by reaction of DA-18C6-BHA (1 mM, 8.7  $\mu\text{g}$ , 2  $\mu\text{L}$ / 0.25 M  $\text{NH}_4\text{OAc}$ , pH 7.0) and DFO (1 mM, 13  $\mu\text{g}$ , 2  $\mu\text{L}$ / 0.25 M  $\text{NH}_4\text{OAc}$ , pH 7.0) with  $^{89}\text{Zr}$  (1.05  $\mu\text{L}$ , 1.11 MBq, 30  $\mu\text{Ci}$ ) in 0.25 M  $\text{NH}_4\text{OAc}$  buffer (pH 7.0), respectively. The total volume of the resulting solution was brought up to 20  $\mu\text{L}$  by adding 0.25 M  $\text{NH}_4\text{OAc}$  solution (pH 7.0). Completion of radiolabeling was determined by ITLC-SA (eluent: 100mM

EDTA, pH 5.0), and the resulting complexes  $^{89}\text{Zr-DA-18C6-BHA}$  and  $^{89}\text{Zr-DFO}$  were directly used for EDTA challenge studies without further purification. A solution of EDTA (18  $\mu\text{l}$ , 100 mM/  $\text{H}_2\text{O}$ , pH 7.0) at a 100-fold molar excess was added to a solution of  $^{89}\text{Zr-DA-18C6-BHA}$  (0.99 MBq, 27  $\mu\text{Ci}$ , 18  $\mu\text{l}$ / 0.25 M  $\text{NH}_4\text{OAc}$ , pH 7.0) or a solution of  $^{89}\text{Zr-DFO}$  (0.99 MBq, 27  $\mu\text{Ci}$ , 18  $\mu\text{l}$ / 0.25 M  $\text{NH}_4\text{OAc}$ , pH 7.0). The resulting mixture was incubated at 37  $^\circ\text{C}$  for 7 days. At each of the time points, the stability of  $^{89}\text{Zr-DA-18C6-BHA}$  and  $^{89}\text{Zr-DFO}$  complex in the presence of EDTA at a 100-fold molar excess was determined using ITLC-SA (eluent: 100mM EDTA, pH 5.0). The radiolabeled complex  $^{89}\text{Zr-DA-18C6-BHA}$  or  $^{89}\text{Zr-DFO}$  was detected at  $\sim 30$  mm from the bottom of the TLC plate, while unbound  $^{89}\text{Zr}$  moved faster ( $\sim 65$  mm).

**Apotransferrin challenge of  $^{89}\text{Zr}$ -radiolabeled complexes.** Apotransferrin was purchased from Sigma-Aldrich (#T1147). Phosphate buffered saline (1 $\times$ , pH 7.4, Corning, #21-040-CV) was treated with Chelex-100 resin (Biorad, #142-2842, 1 g/100 mL buffer solution), shaken overnight at room temperature, and filtered through a 0.22  $\mu\text{M}$  filter (Corning, #430320). The chelexed PBS was used to prepare a solution of apo-transferrin (500  $\mu\text{M}$ ).  $^{89}\text{Zr-DA-18C6-BHA}$  and  $^{89}\text{Zr-DFO}$  was prepared by reaction of DA-18C6-BHA (1mM, 8.7  $\mu\text{g}$ , 2  $\mu\text{L}$  in 0.25M  $\text{NH}_4\text{OAc}$ , pH 7.0) or DFO (1mM, 13  $\mu\text{g}$ , 2  $\mu\text{L}$  in 0.25M  $\text{NH}_4\text{OAc}$ , pH 7.0) with  $^{89}\text{Zr}$  (0.88  $\mu\text{L}$ , 1.11 MBq, 30  $\mu\text{Ci}$ ) in 0.25 M  $\text{NH}_4\text{OAc}$  buffer (pH 7.0), respectively. The total volume of the resulting solution was brought up to 20  $\mu\text{L}$  by adding 0.25 M  $\text{NH}_4\text{OAc}$  solution (pH 7.0). Completion of radiolabeling was determined by ITLC-SA (eluent: 100mM EDTA, pH 5.0), and the resulting complexes  $^{89}\text{Zr-DA-18C6-BHA}$  and  $^{89}\text{Zr-DFO}$  were directly used for apotransferrin challenge assays without further purification. A solution of apotransferrin (200  $\mu\text{l}$ , 500  $\mu\text{M}$  in PBS) at a 5-fold molar excess was added to a solution of  $^{89}\text{Zr-DA-18C6-BHA}$  (1.11 MBq, 30  $\mu\text{Ci}$ /20  $\mu\text{l}$  0.25 M  $\text{NH}_4\text{OAc}$  buffer). A solution of apotransferrin (200  $\mu\text{l}$ , 500  $\mu\text{M}$  in PBS) at a 5-fold molar excess was added to a solution of  $^{89}\text{Zr-DFO}$  (1.11 MBq, 30  $\mu\text{Ci}$ /20  $\mu\text{l}$  0.25 M  $\text{NH}_4\text{OAc}$  buffer). The resulting mixture was incubated at 37 $^\circ\text{C}$  for 7 days. The stability of  $^{89}\text{Zr-DA-18C6-BHA}$  and  $^{89}\text{Zr-}$

DFO complex in the presence of apotransferrin at a 5-fold molar excess was determined using ITLC-SA (eluent: 100mM EDTA, pH 5.0). The radiolabeled complex  $^{89}\text{Zr}$ -DA-18C6-BHA or  $^{89}\text{Zr}$ -DFO was detected at 20 - 45 mm from the bottom of the TLC plate, while unbound radionuclide  $^{89}\text{Zr}$  moved faster (50 - 75 mm).

***In vivo* biodistribution studies.** All animal experiments were conducted in accordance with the guidelines established by the Animal Care and Use Committee of the University of Iowa. Six to eight weeks old CD-1 mice were obtained from Charles River Laboratories and housed one week prior to the studies.  $^{89}\text{Zr}$ -labeled chelator (DA-18C6-BHA) was freshly prepared prior to *in vivo* biodistribution studies.  $^{89}\text{Zr}$ -labeled DFO was also evaluated for comparison. Stock solution of the radioisotopes (75  $\mu\text{L}$ , 3 mCi) was adjusted to pH 7.0 by adding 1 M  $\text{Na}_2\text{CO}_3$  solution. Each chelator (50  $\mu\text{g}$ ) in buffer solution (0.25 M  $\text{NH}_4\text{OAc}$ , pH 7.0) and  $^{89}\text{Zr}$  (100  $\mu\text{Ci}$ ) were sequentially added to a microcentrifuge tube (1.5 mL). The total volume of the reaction mixture was 30  $\mu\text{L}$ . The resulting mixture was reacted in a thermomixer (Eppendorf, 5355) set at 300 rpm at 37  $^\circ\text{C}$  for 1 h.

Completion of Zr-89 labeling was determined by TLC followed by phosphor imaging (Typhoon, FLA 7000). An aliquot of  $^{89}\text{Zr}$ -radiolabeled complex (3  $\mu\text{Ci}$ ) was intravenously injected via the tail vein in a volume of 100  $\mu\text{L}$  of sterilized saline. At 1 h, 4 h and 24 h post-injection, mice were sacrificed, and blood, liver, kidney, muscle, and bone were collected, weighed, and counted in a Cobra II auto gamma counter. The radioactivity from each tissue/organ was decay-corrected by a known aliquot of the injected dose, and the percent-injected dose per gram of tissue (% ID/g) was calculated. Values were presented as mean  $\pm$  SD for each group of 4 mice.

## II. NMR Spectra of compounds 2, 4, and 5.

Figure S1.  $^1\text{H}$  NMR spectrum of compound 2

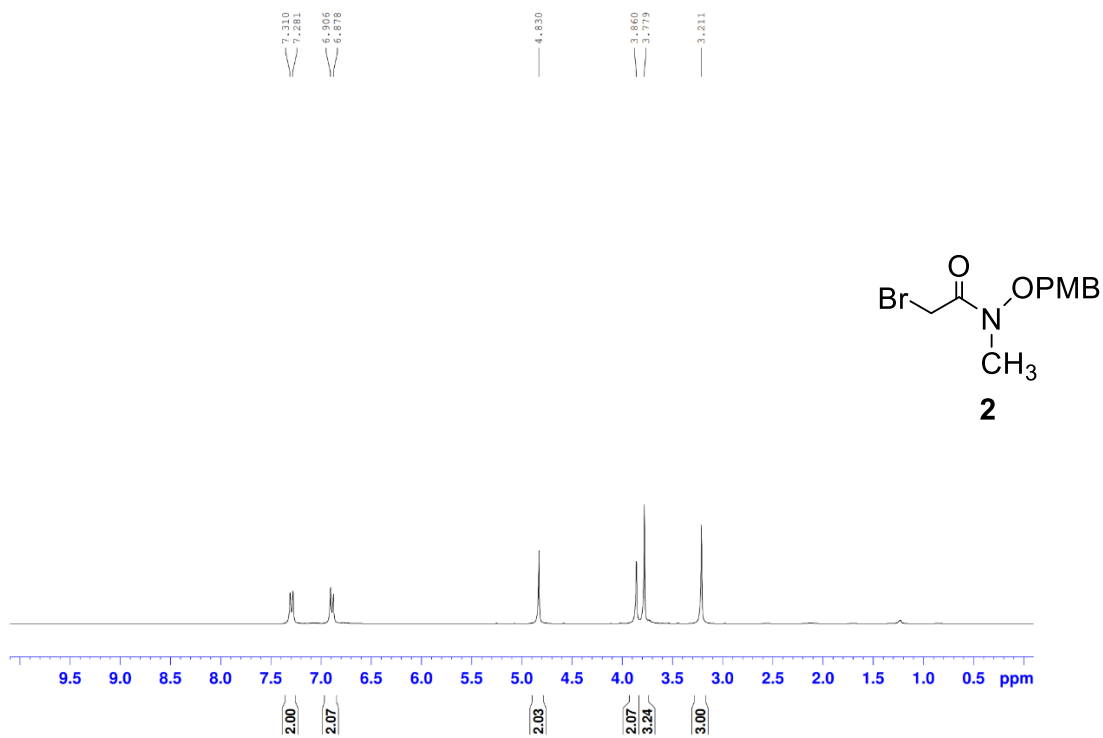

Figure S2.  $^{13}\text{C}$  NMR spectrum of compound 2

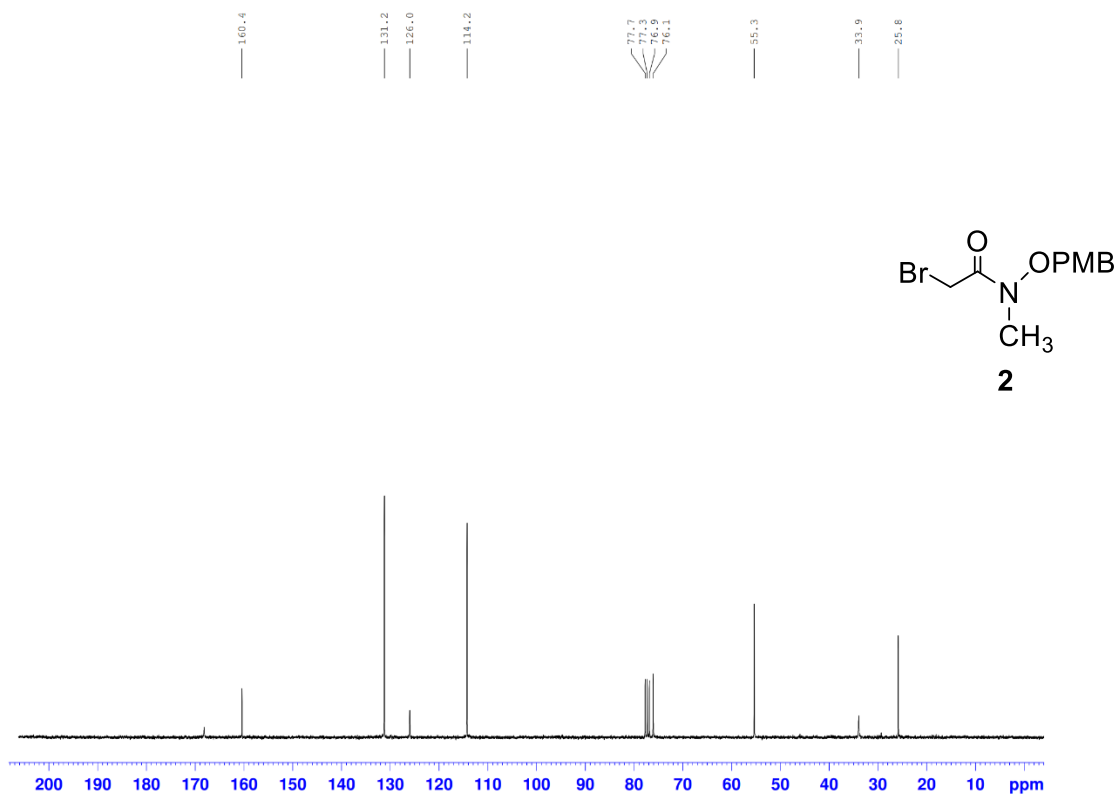

Figure S3. <sup>1</sup>H NMR spectrum of compound 4

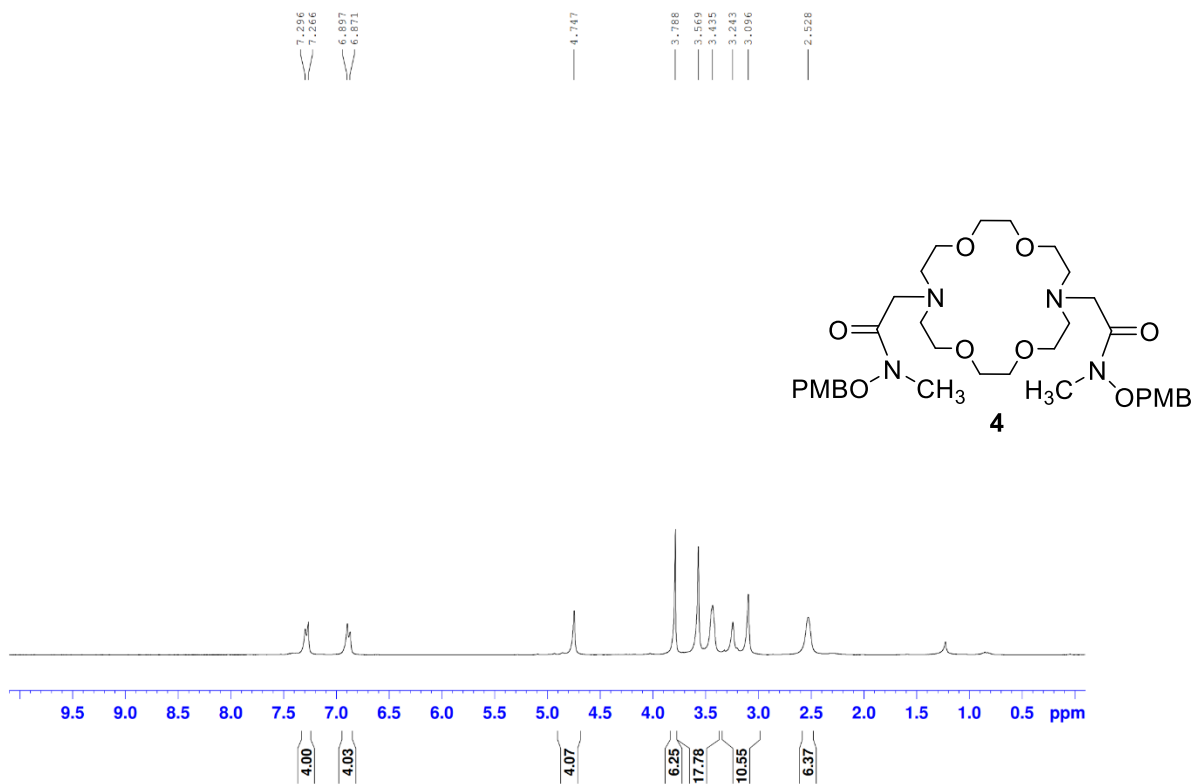

Figure S4. <sup>13</sup>C NMR spectrum of compound 4

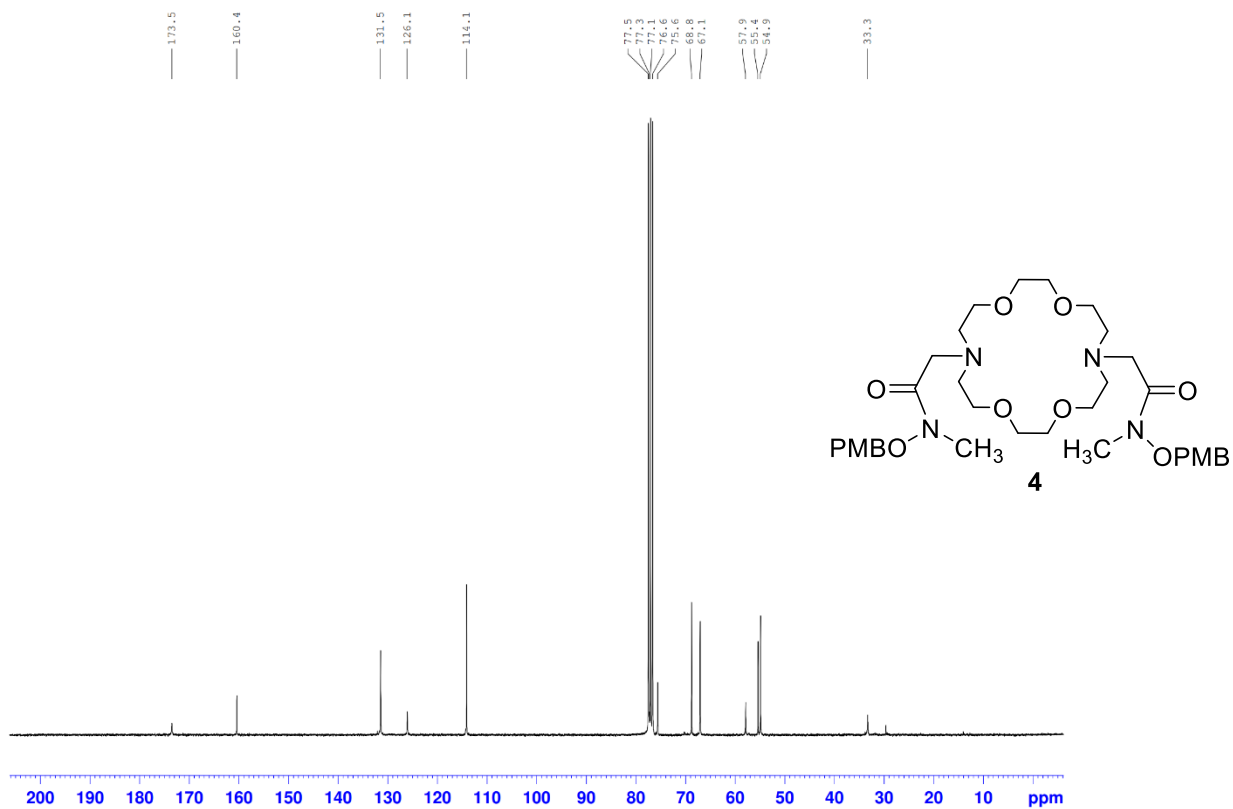



Figure S5.  $^1\text{H}$  NMR spectrum of compound 5

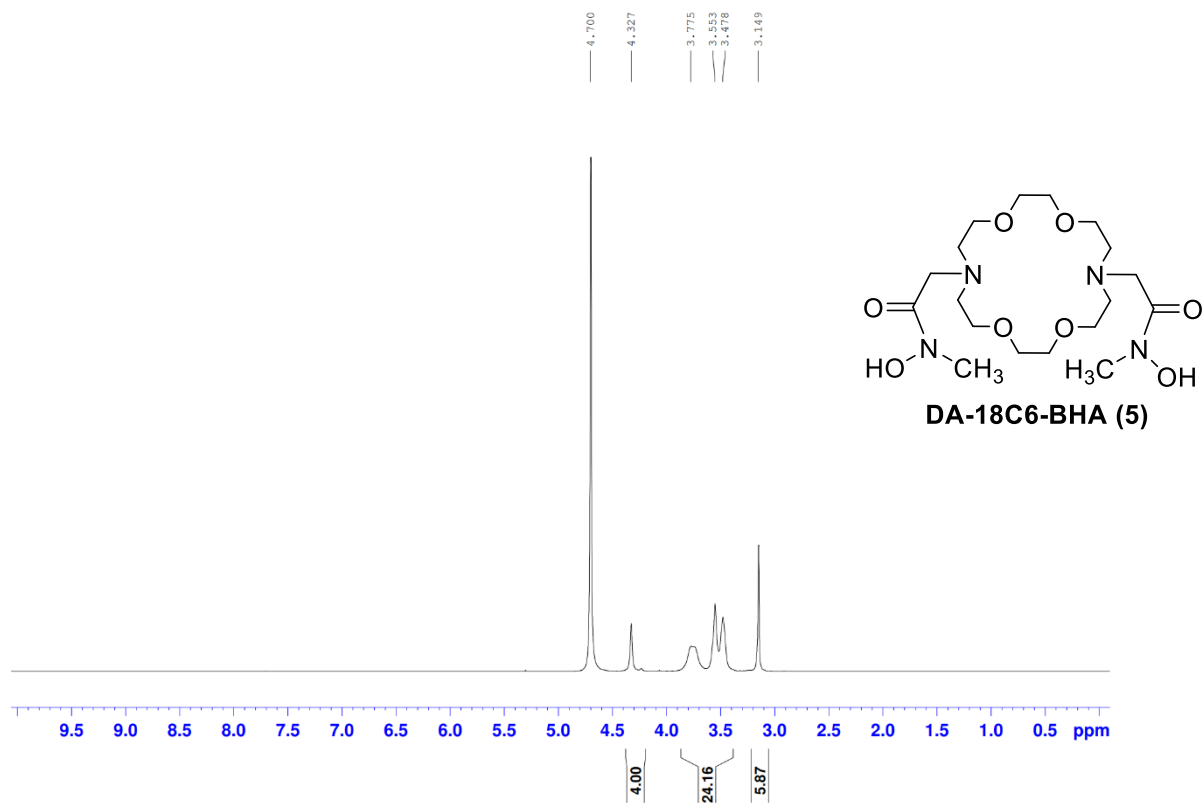

Figure S6.  $^{13}\text{C}$  NMR spectrum of compound 5

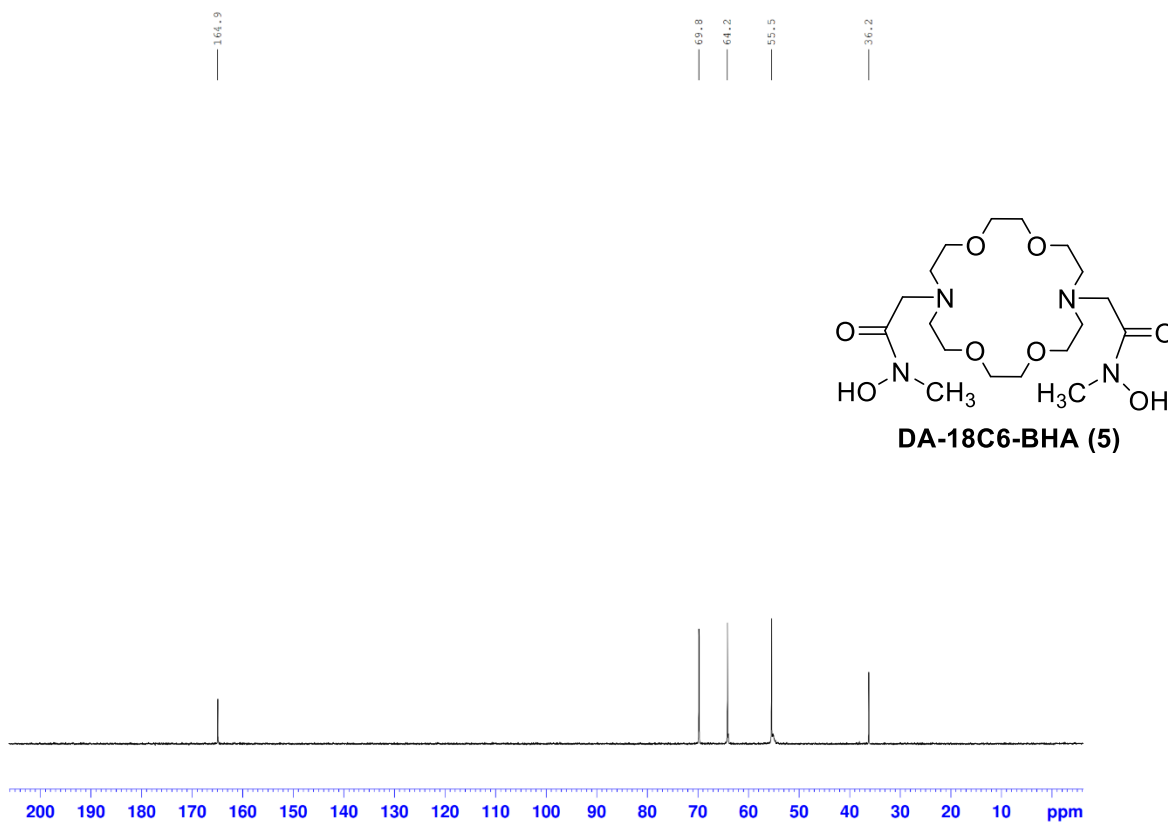

### III. Evaluation of chelators for radiolabeling with $^{89}\text{Zr}$

**Table S1. Radiolabeling efficiency (%) with  $^{89}\text{Zr}$  (pH 7, RT, ITLC)**

| Time   | Radiolabeling efficiency (%) |      |
|--------|------------------------------|------|
|        | DA-18C6-BHA                  | DFO  |
| 1 min  | 90.2                         | 99.1 |
| 10 min | 98.2                         | 99.1 |
| 30 min | 99.5                         | 99.4 |

\*Radiolabeling efficiency (mean  $\pm$  standard deviation%) was measured using ITLC (eluent: 100mM EDTA, pH 5.0).

**Figure S7. Control ITLC of unbound radionuclide ( $^{89}\text{Zr}$ -oxalate)**

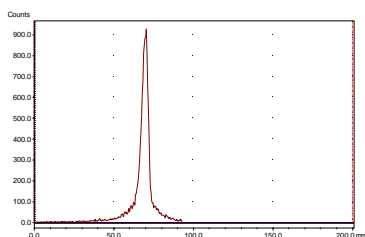

**Figure S8. Radiolabeling of DA-18C6-BHA with  $^{89}\text{Zr}$**

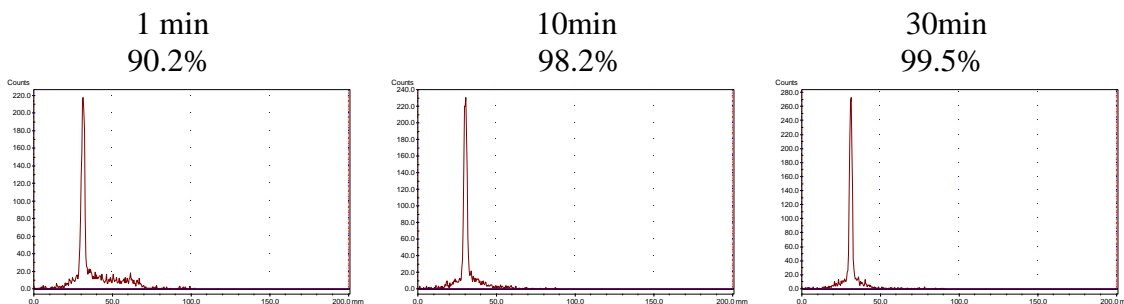

**Figure S9. Radiolabeling of DFO with  $^{89}\text{Zr}$**

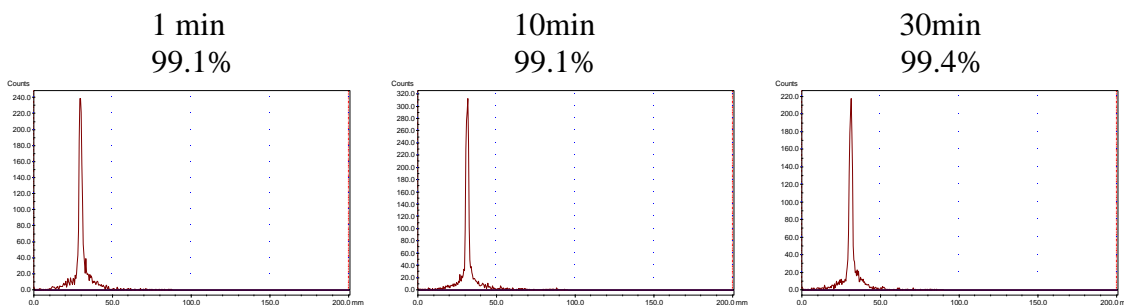

#### IV. Evaluation of $^{89}\text{Zr}$ -labeled complexes for stability in human serum (pH 7.0, 37 °C, ITLC, duplicate).

**Figure S10. Complex Stability of  $^{89}\text{Zr}$ -labeled DA-18C6-BHA in human serum**

0 hr

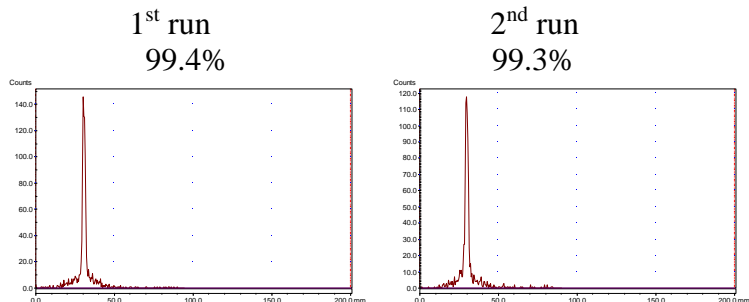

24 hr

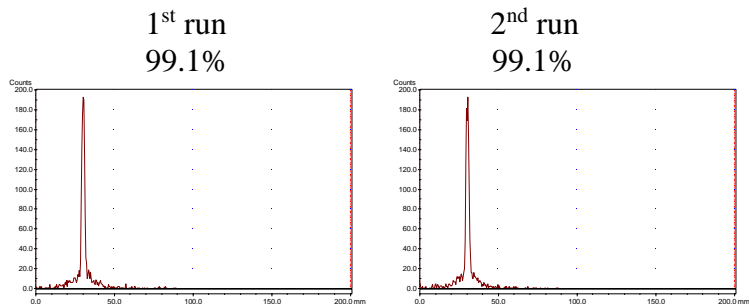

48 hr

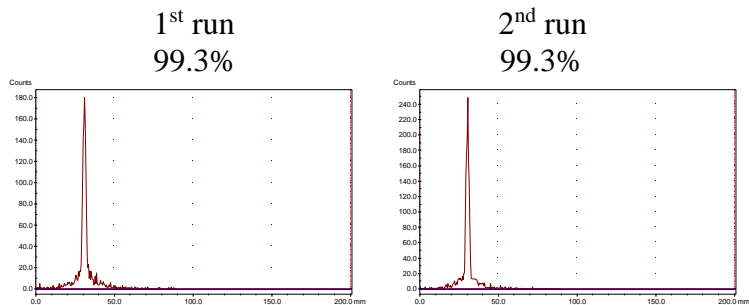

72 hr

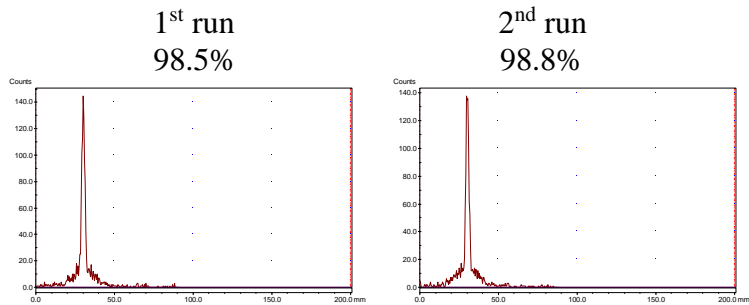

168 hr

1<sup>st</sup> run  
98.8%

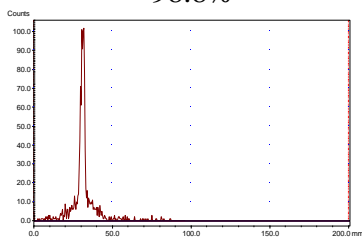

2<sup>nd</sup> run  
99.2%

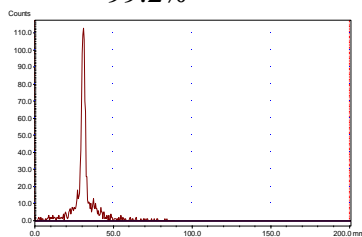

**Figure S11. Complex Stability of <sup>89</sup>Zr-labeled DFO in human serum**

0 hr

1<sup>st</sup> run  
99.1%

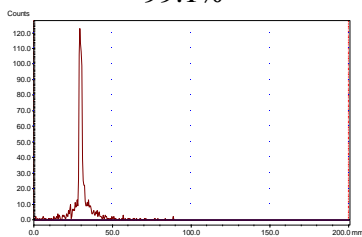

2<sup>nd</sup> run  
99.8%

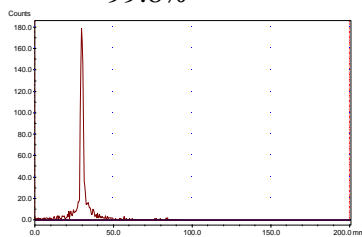

24 hr

1<sup>st</sup> run  
99.1%

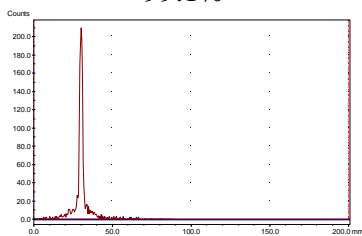

2<sup>nd</sup> run  
99.2%

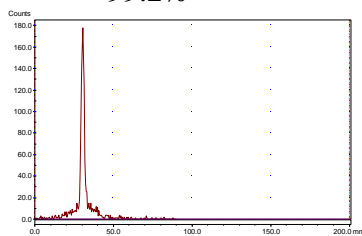

48 hr

1<sup>st</sup> run  
99.1%

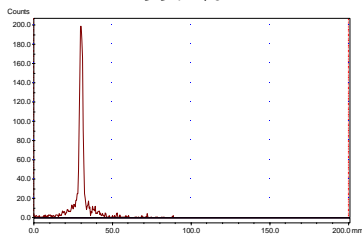

2<sup>nd</sup> run  
99.5%

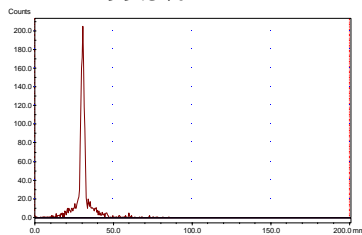

72 hr

1<sup>st</sup> run  
98.1%

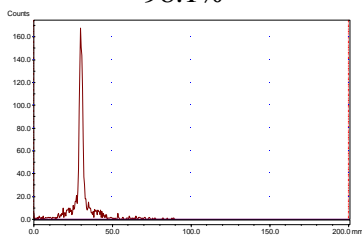

2<sup>nd</sup> run  
99.2%

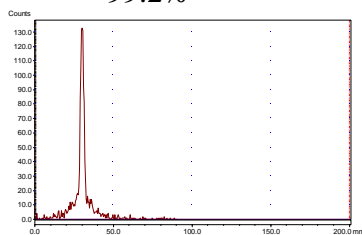

168 hr

1<sup>st</sup> run  
98.6%

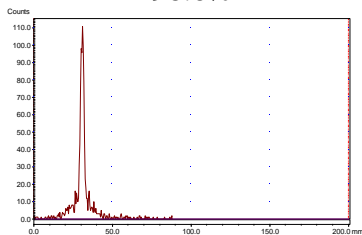

2<sup>nd</sup> run  
99.3%

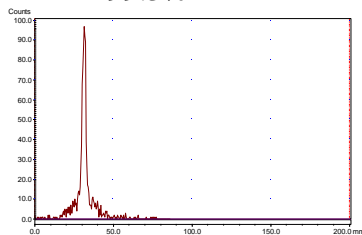

**V. Evaluation of <sup>89</sup>Zr-labeled complexes for stability in EDTA solution (100-fold molar excess, pH 7.0, 37°C, ITLC, duplicate).**

**Figure S12. Complex Stability of <sup>89</sup>Zr-DA-18C6-BHA in EDTA solution**

0hr

1<sup>st</sup> run  
99.3%

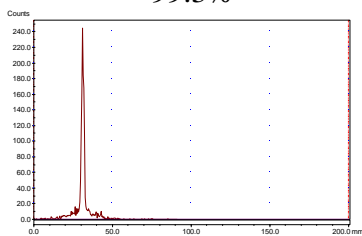

2<sup>nd</sup> run  
99.2%

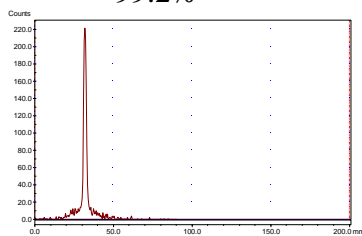

1hr

1<sup>st</sup> run  
99.7%

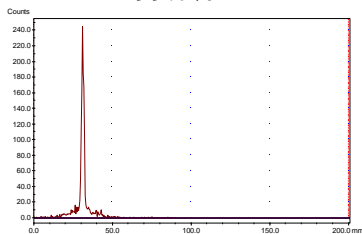

2<sup>nd</sup> run  
99.5%

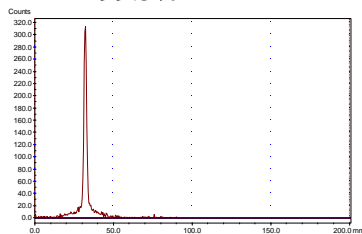

24hr

1<sup>st</sup> run  
99.1%

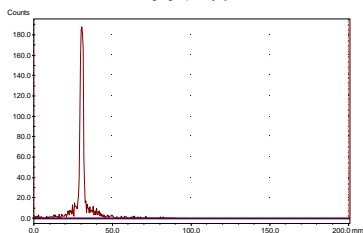

2<sup>nd</sup> run  
98.8%

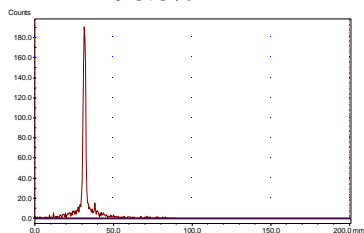

48hr

1<sup>st</sup> run  
99.1%

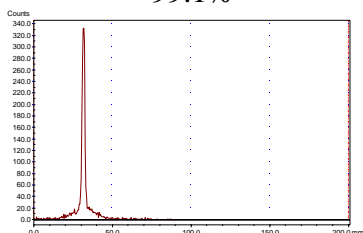

2<sup>nd</sup> run  
98.8%

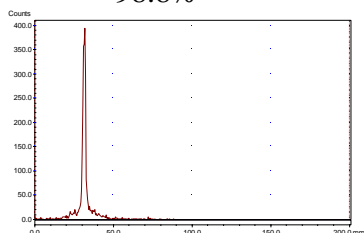

168hr

1<sup>st</sup> run  
98.9%

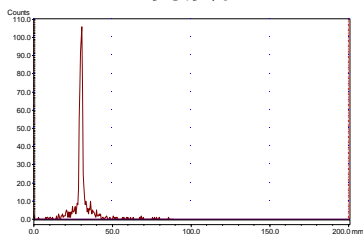

2<sup>nd</sup> run  
99.3%

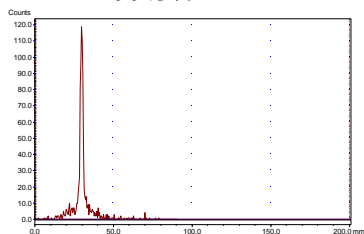

**Figure S13. Complex Stability of <sup>89</sup>Zr-DFO in EDTA solution**

0hr

1<sup>st</sup> run  
99.3%

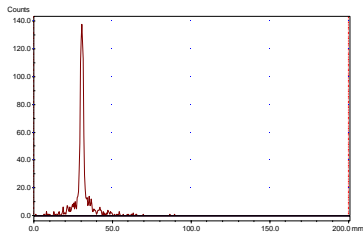

2<sup>nd</sup> run  
99.4%

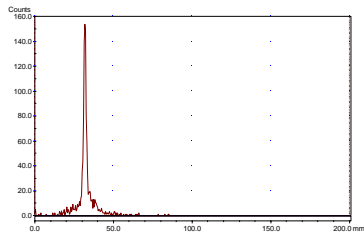

1hr

1<sup>st</sup> run  
98.3%

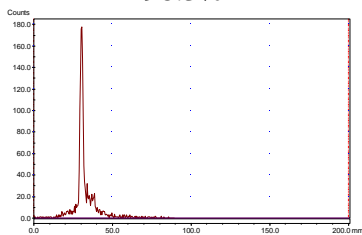

2<sup>nd</sup> run  
97.9%

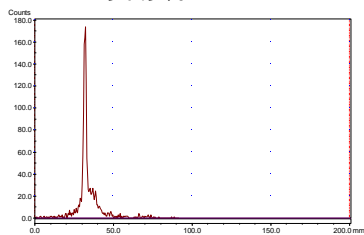

24hr

1<sup>st</sup> run  
92.8%

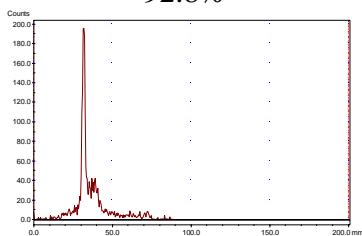

2<sup>nd</sup> run  
92.2%

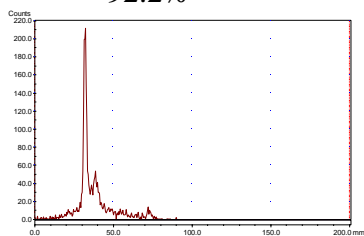

48hr

1<sup>st</sup> run  
89.2%

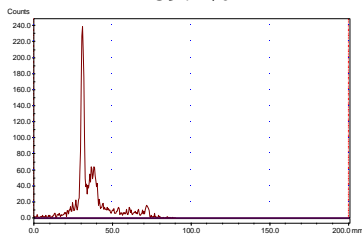

2<sup>nd</sup> run  
88.9%

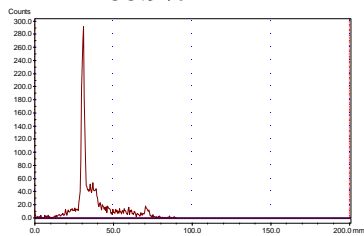

168hr

1<sup>st</sup> run  
88.5%

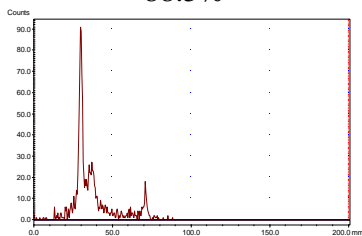

2<sup>nd</sup> run  
89.0%

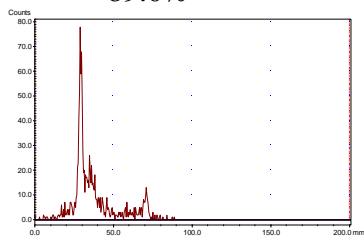

**VI. Evaluation of  $^{89}\text{Zr}$ -labeled complexes for stability in apotransferrin solution (5-fold molar excess, pH 7.0, 37°C, ITLC, duplicate).**

**Figure S14. Complex Stability of  $^{89}\text{Zr}$ -DA-18C6-BHA in apotransferrin solution**

**1<sup>st</sup> run**

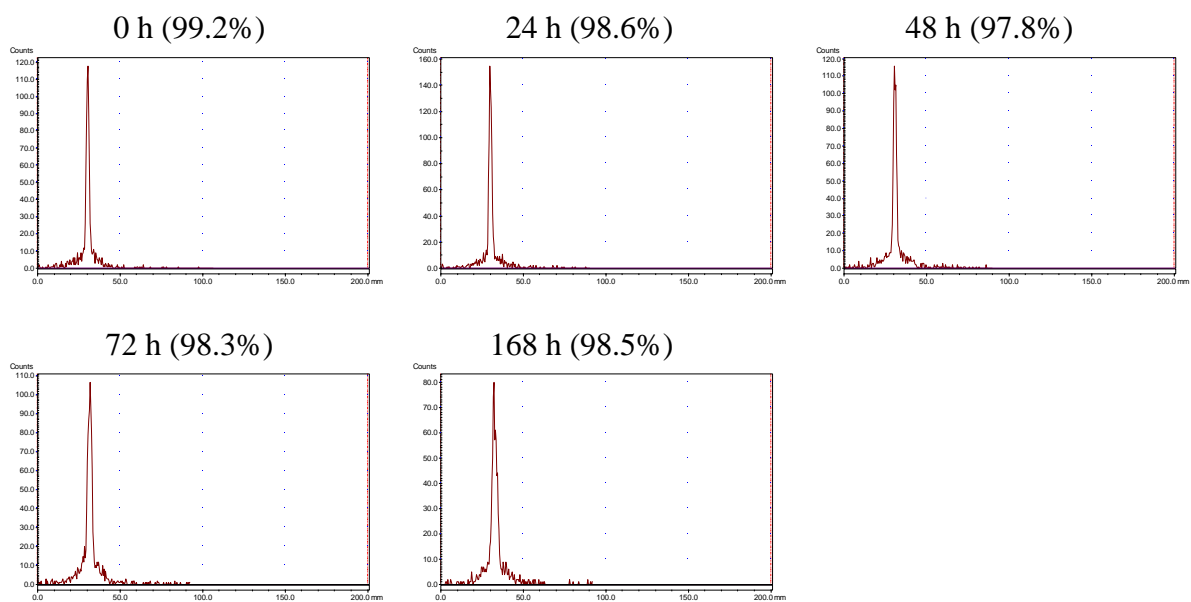

**2<sup>nd</sup> run**

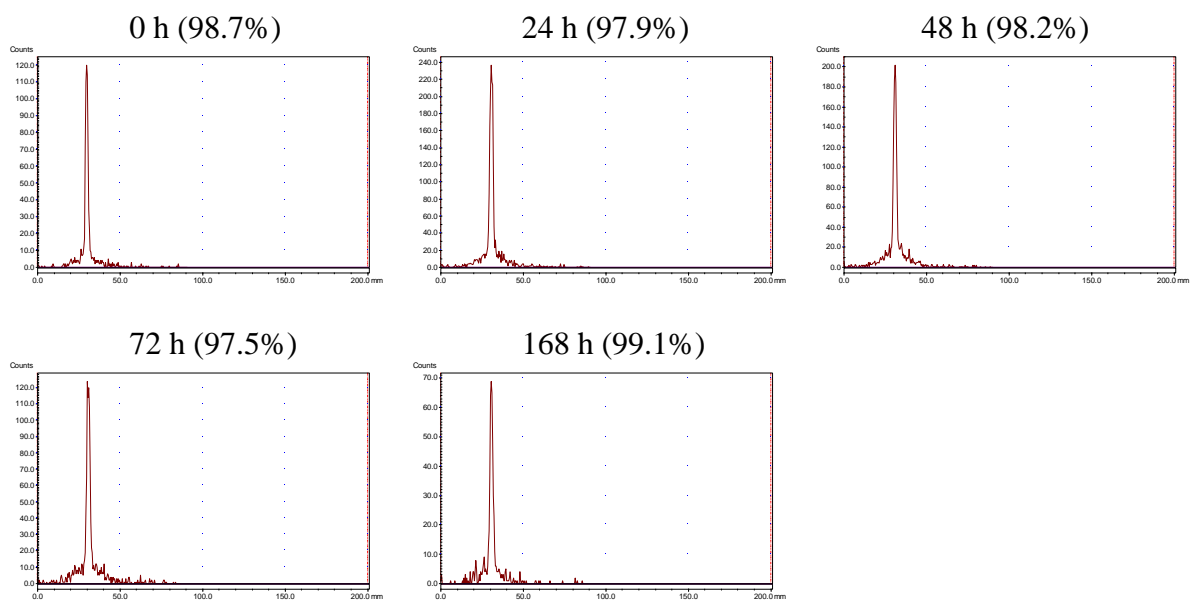



## Figure S15. Complex Stability of $^{89}\text{Zr}$ -DFO in apotransferrin solution

### 1<sup>st</sup> run

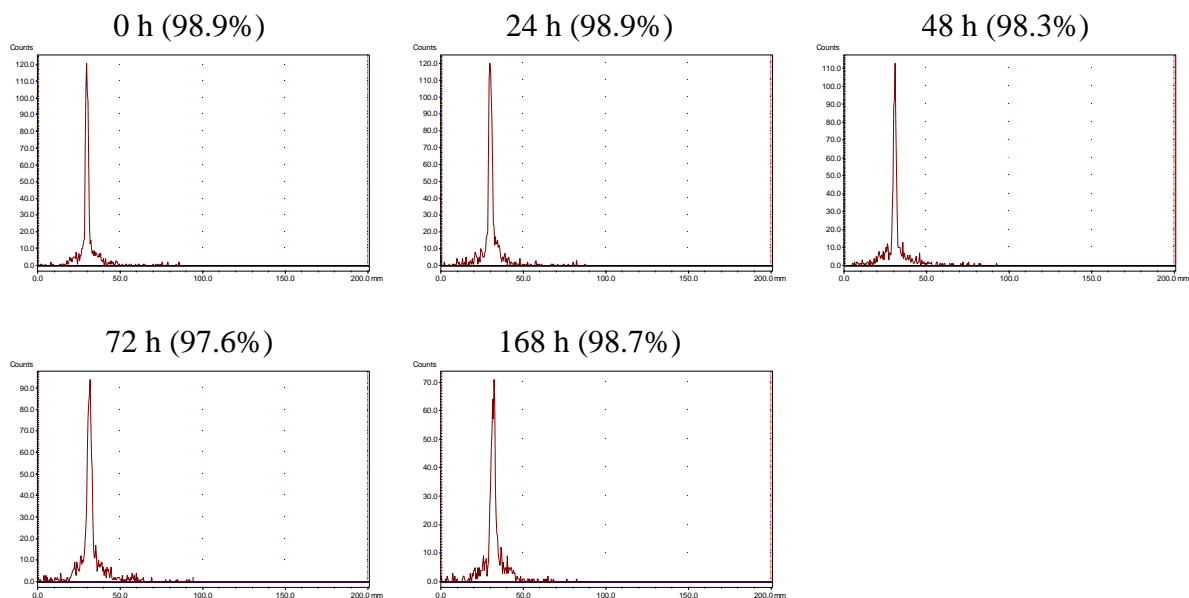

### 2<sup>nd</sup> run

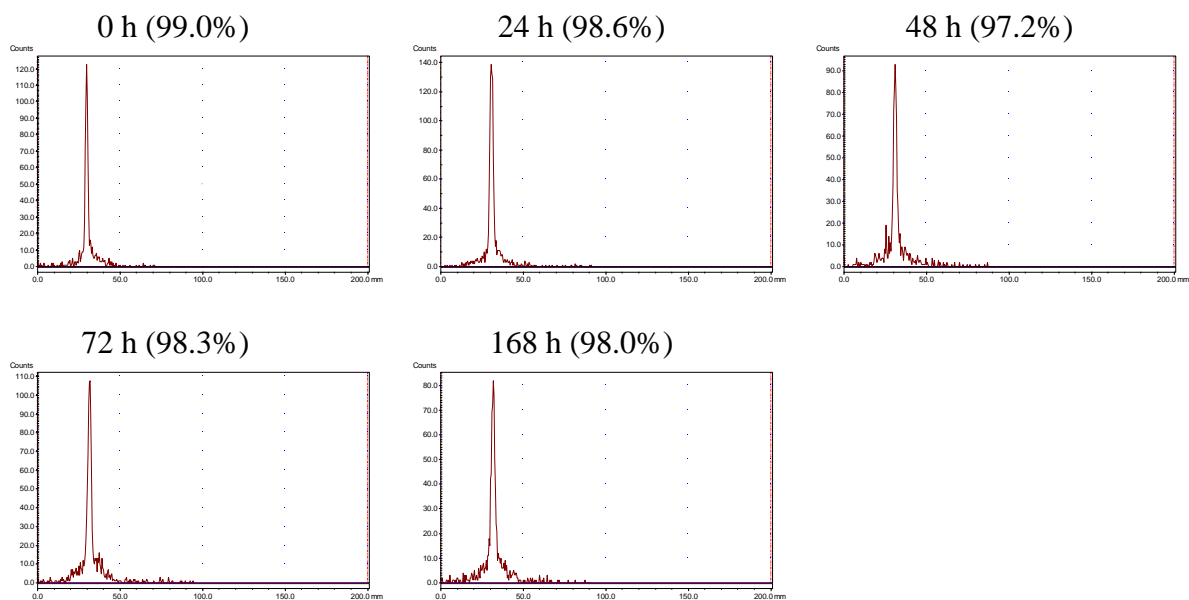

**VII. *In Vivo* Biodistribution of <sup>89</sup>Zr-DFO and <sup>89</sup>Zr-DA-18C6-BHA in CD-1 Mice.**

**Table S2. Percentage of injected dose per gram of tissue (%ID/g)**

| Tissue | Time points (%ID/g) |             |             |             |             |             |
|--------|---------------------|-------------|-------------|-------------|-------------|-------------|
|        | 1 h                 |             | 4 h         |             | 24 h        |             |
|        | DFO                 | DA-18C6-BHA | DFO         | DA-18C6-BHA | DFO         | DA-18C6-BHA |
| blood  | 0.02 ± 0.02         | 0.05 ± 0.04 | 0.04 ± 0.02 | 0.12 ± 0.14 | 0.02 ± 0.01 | 0.03 ± 0.01 |
| liver  | 0.03 ± 0.01         | 0.43 ± 0.06 | 0.04 ± 0.01 | 0.44 ± 0.03 | 0.01 ± 0.00 | 0.30 ± 0.05 |
| kidney | 0.23 ± 0.03         | 0.21 ± 0.02 | 0.25 ± 0.03 | 0.15 ± 0.02 | 0.16 ± 0.02 | 0.12 ± 0.01 |
| muscle | 0.04 ± 0.02         | 0.06 ± 0.02 | 0.05 ± 0.01 | 0.05 ± 0.01 | 0.03 ± 0.01 | 0.05 ± 0.02 |
| bone   | 0.06 ± 0.02         | 0.11 ± 0.01 | 0.09 ± 0.03 | 0.09 ± 0.02 | 0.04 ± 0.02 | 0.07 ± 0.01 |
